# Supplementary material for: The N-terminal zinc finger domain of Tgf2 transposase contributes to DNA binding and to transposition activity
Source: PubMed Central journal article supplement (PMC4890040; doi:10.1038/srep27101), 2016-06-02
Supplement: srep27101-s1.pdf [file srep27101-s1.pdf]

**The N-terminal zinc finger domain of *Tgf2* transposase contributes to DNA  
binding and to transposition activity**

Xia-Yun Jiang<sup>1,2a</sup>, Fei Hou<sup>1a</sup>, Xiao-Dan Shen<sup>2</sup>, Xue-Di Du<sup>3</sup>, Hai-Li Xu<sup>1</sup> and  
Shu-Ming Zou<sup>2\*</sup>

1 College of Food Science and Technology, Shanghai Ocean University,

Huchenghuan Road 999, Shanghai 201306, China

2 Key Laboratory of Freshwater Aquatic Genetic Resources, Shanghai Ocean

University, Huchenghuan Road 999, Shanghai 201306, China

3 College of animal science and technology, Yangzhou University, Wenhui Road 48,

Yangzhou 225009, China

<sup>a</sup> These authors contributed equally to this work

\* To whom correspondence should be addressed.

E-mail: [smzou@shou.edu.cn](mailto:smzou@shou.edu.cn)

## SUPPLEMENTARY FIGURES

**Supplemental Figure 1:** Size exclusion chromatography analysis of S1-, S2- or L-*Tgf2*TPases binding with random 50-mer double stranded DNA control C50.

(a) Elution profiles of C50 double stranded DNA probe alone; (b-c) Elution profiles of S1-*Tgf2*TPase alone (b) or a mixture of S1-*Tgf2*TPase and C50 (c); (d-e) Elution profiles of S2-*Tgf2*TPase alone (d) or a mixture of S2-*Tgf2*TPase and C50 (e). (f-g) Elution profiles of L-*Tgf2*TPase alone (f) or a mixture of L-*Tgf2*TPase and C50 (g). (h-i) Elution profiles of L-*Tgf2*TPase<sup>D228N, E648Q</sup> alone (h) or a mixture of L-*Tgf2*TPase<sup>D228N, E648Q</sup> and C50 (i). Based on elution times, peak 1 corresponds to C50 probes and peaks 2 and 3 represent *Tgf2*TPase dimers and monomers, respectively.

**Supplemental Figure 2:** Terminal inverted repeats (TIRs) and subterminal repeats (STRs) within the left (220bp) and right (185bp) ends of the *Tgf2* element. The 11 bp TIRs are underscored. Arrows suggest the occurrence of A/GAGTA STR motifs. Gray sequences show double-stranded DNA L50 probe for size exclusion chromatography.

# Supplemental Figure 1:

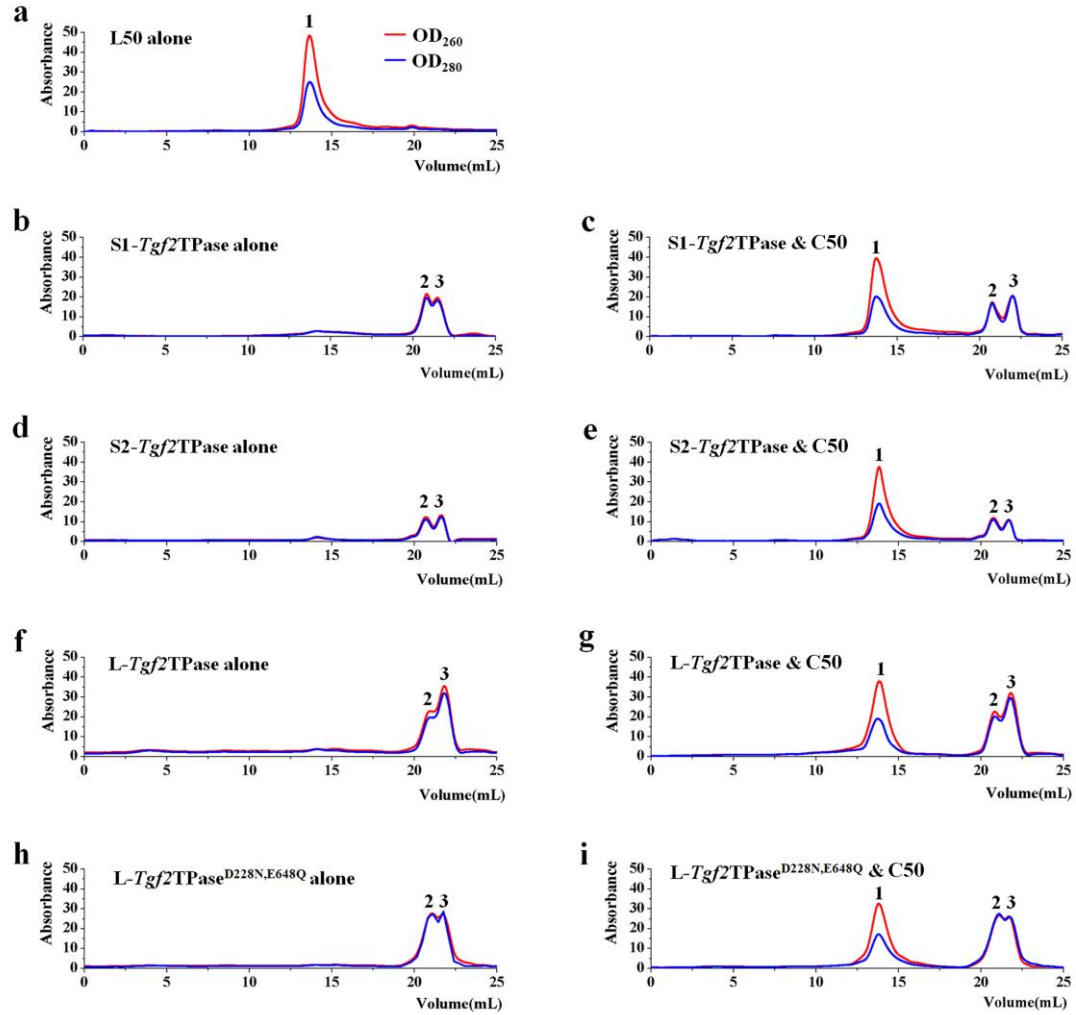

## Supplemental Figure 2:

### *Tgf2* left-end

..... 10 ..... 20 ..... 30 ..... 40 ..... 50 ..... 60 ..... 70  
CAGAGGTGTAAAAGTACTTGAGTAAATTTACTTGATTACTGTACTTAAGTATTATTTTTGGGGATTTTTA  
GTCTCCACATTTTCATGAACTCATTAAAATGAACTAATGACATGAATT CATAATAAAAAACCCCTAAAAAT

..... 80 ..... 90 ..... 100 ..... 110 ..... 120 ..... 130 ..... 140  
CTTTACTTGAGTACAATTAATAAATCAATACTTTTACTTTTACTTAATTACATTTTTTTAGAAAAAAGT  
GAAATGAACTCATGTTAATTTTTAGTTATGAAAATGAAAATGAATTAATGTAATAAAAAATCTTTTTTCA

..... 150 ..... 160 ..... 170 ..... 180 ..... 190 ..... 200 ..... 210  
ACTTTTTACTCCTTACAATTTTATTTACAGTCAAAAAGTACTTATTTTTGGAGATCACTTCATTCTATT  
TGAATAATGAGGAATGTTAAAATAAATGTCAGTTTTTCATGAATAAAAAACCTCTAGTGAAGTAAGATAA

..... 220 ..... 4540 ..... 4550 ..... 4560 ..... 4570 ..... 4580  
TTCCCTTGCT ..... TCTAGTTTTCATTCTTGCTTTTACTTTTACTTCTTTAATACTCAA  
AAGGGAACGA ..... AGATCAAAAAGTAAGAACGAAAATGAAAATGAAAGAAATTATGAGTT

..... 4590 ..... 4600 ..... 4610 ..... 4620 ..... 4630 ..... 4640 ..... 4650  
GTACAATTTTAAATGGAGTACTTTTTTACTTTTACTCAAGTAAGATTCTAGCCAGATACTTTTACTTTTAA  
CATGTTAAAATTACCTCATGAAAAAATGAAAATGAGTTCATTCTAAGATCGGTCTATGAAAATGAAAATT

..... 4660 ..... 4670 ..... 4680 ..... 4690 ..... 4700 ..... 4710 ..... 4720  
TTGAGTAAAATTTCCCTAAGTACTTGTACTTTCACTTGAGTAAAATTTTGGAGTACTTTTACACCTCTG  
AACTCATTTTTAAAAGGGATT CATGAACATGAAAGTGAACCTATTTTAAAAACTCATGAAAATGTGGAGAC

*Tgf2* right-end
